# Supplementary material
Source: PubMed Central journal article supplement (PMC7250000)
Supplement: NIHMS1581356-supplement-1.pdf [file NIHMS1581356-supplement-1.pdf]

## ***APOE4* leads to blood-brain barrier dysfunction predicting cognitive decline**

Axel Montagne, Daniel A. Nation, Abhay P. Sagare, Giuseppe Barisano, Melanie D. Sweeney, Ararat Chakhoyan, Maricarmen Pachicano, Elizabeth Joe, Amy R. Nelson, Lina M. D'Orazio, David P. Buennagel, Michael G. Harrington, Tammie L. S. Benzinger, Anne M. Fagan, John M. Ringman, Lon S. Schneider, John C. Morris, Eric M. Reiman, Richard J. Caselli, Helena C. Chui, Julia TCW, Yining Chen, Judy Pa, Peter S. Conti, Meng Law, Arthur W. Toga and Berislav V. Zlokovic\*

## SUPPLEMENTARY INFORMATION

### *Supplementary Information Guide*

#### 1. Supplementary Tables (5)

*Supplementary Table 1:* Hierarchical logistic regression analyses of the blood-brain barrier  $K_{trans}$  constant in the hippocampus (HC) and parahippocampal gyrus (PHG) predicting cognitive impairment in *APOE4* and *APOE3* carriers based on clinical dementia rating (CDR) score 0.5 versus 0 after controlling for age, sex, education, HC and PHG volumes, and CSF  $A\beta_{1-42}$  and pTau status.

*Supplementary Table 2:* Linear mixed model analysis of CSF sPDGFR $\beta$  baseline values predicting future cognitive decline on age-, sex-, and education-corrected z-scores on mental status exam and the global cognitive composite of all neuropsychological tests after controlling for CSF  $A\beta$  and tau status.

*Supplementary Table 3:* Linear mixed model analysis of CSF sPDGFR $\beta$  baseline values predicting future cognitive decline on age-, sex-, and education-corrected z-scores on mental status exam and the global cognitive composite of all neuropsychological tests in *APOE4* carriers after controlling for CSF  $A\beta$  and tau status.

*Supplementary Table 4:* Linear mixed model analysis of the overall incremental predictive value of CSF sPDGFR $\beta$  baseline values in relation to cognitive decline on age-, sex-, and education-corrected z-scores on mental status exam and the global cognitive composite of all neuropsychological tests in *APOE3* carriers after controlling for CSF  $A\beta$  and tau status.

*Supplementary Table 5:* Hierarchical logistic regression analyses of CSF sPDGFR $\beta$  baseline values predicting cognitive impairment in *APOE4* but not in *APOE3* carriers based on clinical dementia rating (CDR) score 0.5 versus 0 after controlling for age, sex, education, HC and PHG volumes, and CSF  $A\beta_{1-42}$  and pTau status.

#### 2. Supplementary Methods

*Quantification of the Blood-Brain Barrier Permeability*

#### 3. Supplementary Discussion

#### 4. Supplementary References

## 1. Supplementary Tables (5)

Supplementary Table 1. Hierarchical logistic regression analyses of the blood-brain barrier  $K_{trans}$  constant in the hippocampus (HC) and parahippocampal gyrus (PHG) predicting cognitive impairment in *APOE4* and *APOE3* carriers based on clinical dementia rating (CDR) score 0.5 versus 0 after controlling for age, sex, education, HC and PHG volumes, and CSF  $A\beta_{1-42}$  and pTau status.

| <i>APOE4</i> carriers<br>(n=93)  | HC $K_{trans}$ predicting CDR status  |                                                           | -2 Log<br>Likelihood | Chi-<br>square | df    | p-value              |
|----------------------------------|---------------------------------------|-----------------------------------------------------------|----------------------|----------------|-------|----------------------|
|                                  | Model Parameters for Step 1           |                                                           | 43.477               | 17.131         | 1     | $3.5 \times 10^{-5}$ |
|                                  | Step                                  | Predictor                                                 | $\beta$              | SE             | Wald  | p-value              |
|                                  | 0                                     | Age (yrs)                                                 | -0.015               | 0.041          | 0.133 | 0.716                |
|                                  | 0                                     | Sex (ratio)                                               | -0.077               | 0.819          | 0.009 | 0.925                |
|                                  | 0                                     | Education (attainment)                                    | 0.269                | 0.225          | 1.431 | 0.232                |
|                                  | 0                                     | HC volume (mm <sup>3</sup> )                              | -0.001               | <0.001         | 5.186 | 0.023                |
|                                  | 0                                     | CSF $A\beta_{1-42}$ (status)                              | -1.252               | 0.781          | 2.565 | 0.109                |
|                                  | 0                                     | CSF pTau (status)                                         | 0.487                | 1.031          | 0.223 | 0.636                |
|                                  | 1                                     | HC BBB $K_{trans}$ ( $\times 10^{-3} \text{ min}^{-1}$ )  | 6.700                | 2.212          | 9.173 | 0.002                |
| <i>APOE4</i> carriers<br>(n=93)  | PHG $K_{trans}$ predicting CDR status |                                                           | -2 Log<br>Likelihood | Chi-<br>square | df    | p-value              |
|                                  | Model Parameters for Step 1           |                                                           | 44.260               | 13.156         | 1     | $2.9 \times 10^{-4}$ |
|                                  | Step                                  | Predictor                                                 | $\beta$              | SE             | Wald  | p-value              |
|                                  | 0                                     | Age (yrs)                                                 | -0.032               | 0.047          | 0.468 | 0.494                |
|                                  | 0                                     | Sex (ratio)                                               | 0.333                | 0.777          | 0.183 | 0.669                |
|                                  | 0                                     | Education (attainment)                                    | 0.145                | 0.219          | 0.439 | 0.508                |
|                                  | 0                                     | PHG volume (mm <sup>3</sup> )                             | -0.001               | 0.001          | 0.885 | 0.347                |
|                                  | 0                                     | CSF $A\beta_{1-42}$ (status)                              | -0.946               | 0.755          | 1.570 | 0.210                |
|                                  | 0                                     | CSF pTau (status)                                         | -0.789               | 0.841          | 0.880 | 0.348                |
|                                  | 1                                     | PHG BBB $K_{trans}$ ( $\times 10^{-3} \text{ min}^{-1}$ ) | 5.969                | 2.088          | 8.168 | 0.004                |
| <i>APOE3</i> carriers<br>(n=142) | HC $K_{trans}$ predicting CDR status  |                                                           | -2 Log<br>Likelihood | Chi-<br>square | df    | p-value              |
|                                  | Model Parameters for Step 1           |                                                           | 59.843               | 3.846          | 1     | 0.05                 |
|                                  | Step                                  | Predictor                                                 | $\beta$              | SE             | Wald  | p-value              |
|                                  | 0                                     | Age (yrs)                                                 | 0.078                | 0.049          | 2.471 | 0.116                |
|                                  | 0                                     | Sex (ratio)                                               | 0.763                | .691           | 1.221 | 0.269                |
|                                  | 0                                     | Education (attainment)                                    | 0.006                | .156           | 0.001 | 0.970                |
|                                  | 0                                     | HC volume (mm <sup>3</sup> )                              | <0.001               | <0.001         | 0.074 | 0.785                |
|                                  | 0                                     | CSF $A\beta_{1-42}$ (status)                              | 0.192                | 0.731          | 0.069 | 0.793                |
|                                  | 0                                     | CSF pTau (status)                                         | -0.811               | 0.891          | 0.829 | 0.362                |
|                                  | 1                                     | HC BBB $K_{trans}$ ( $\times 10^{-3} \text{ min}^{-1}$ )  | 2.493                | 1.271          | 3.849 | 0.050                |
| <i>APOE3</i> carriers<br>(n=142) | PHG $K_{trans}$ predicting CDR status |                                                           | -2 Log<br>Likelihood | Chi-<br>square | df    | p-value              |
|                                  | Model Parameters for Step 1           |                                                           | 57.864               | 5.923          | 1     | 0.02                 |
|                                  | Step                                  | Predictor                                                 | $\beta$              | SE             | Wald  | p-value              |
|                                  | 0                                     | Age (yrs)                                                 | 0.106                | 0.053          | 3.993 | 0.046                |
|                                  | 0                                     | Sex (ratio)                                               | 1.148                | 0.741          | 2.397 | 0.122                |
|                                  | 0                                     | Education (attainment)                                    | -0.087               | 0.171          | 0.260 | 0.610                |
|                                  | 0                                     | PHG volume (mm <sup>3</sup> )                             | <0.001               | <0.001         | 0.164 | 0.685                |
|                                  | 0                                     | CSF $A\beta_{1-42}$ (status)                              | 0.237                | 0.752          | 0.099 | 0.753                |
|                                  | 0                                     | CSF pTau (status)                                         | -0.891               | 0.890          | 1.003 | 0.317                |
|                                  | 1                                     | PHG BBB $K_{trans}$ ( $\times 10^{-3} \text{ min}^{-1}$ ) | 3.908                | 1.750          | 4.986 | 0.030                |

**Supplementary Table 2. Linear mixed model analysis of CSF sPDGFR $\beta$  baseline values predicting future cognitive decline on age-, sex-, and education-corrected z-scores on mental status exam and the global cognitive composite of all neuropsychological tests after controlling for CSF A $\beta$  and tau status. Significance by linear mixed model analysis; no multiple comparison correction applied. All tests are two-tailed (see Methods for further details).**

**Total Sample (n=146)**

*CSF sPDGFR $\beta$  Predicting Change in Mental Status Controlling for CSF A $\beta_{1-42}$  and pTau status*

|                             | $\beta$                | SE       | df      | t      | p-value              |
|-----------------------------|------------------------|----------|---------|--------|----------------------|
| Intercept                   | -0.350702              | 0.137087 | 128.928 | -2.558 | 0.012                |
| Time                        | -0.233797              | 0.121152 | 96.055  | -1.93  | 0.057                |
| CSF A $\beta_{1-42}$ status | 0.085454               | 0.269908 | 132.122 | 0.317  | 0.752                |
| CSF sPDGFR $\beta$          | -8.95x10 <sup>-5</sup> | 0.000359 | 128.26  | -0.249 | 0.804                |
| CSF sPDGFR $\beta$ x time   | -0.000954              | 0.000307 | 87.447  | -3.103 | 0.003                |
| Intercept                   | -0.325414              | 0.127507 | 130.073 | -2.552 | 0.012                |
| Time                        | -0.257617              | 0.118456 | 98.676  | -2.175 | 0.032                |
| CSF pTau status             | -1.259219              | 0.275932 | 130.946 | -4.564 | 1.1x10 <sup>-5</sup> |
| CSF sPDGFR $\beta$          | -2.06x10 <sup>-4</sup> | 0.000336 | 129.619 | -0.613 | 0.541                |
| CSF sPDGFR $\beta$ x time   | -0.000955              | 0.000302 | 90.817  | -3.159 | 0.002                |

*CSF sPDGFR $\beta$  Predicting Change in Global Composite Controlling for CSF A $\beta_{1-42}$  and pTau status*

|                             | $\beta$   | SE       | df      | t      | p-value |
|-----------------------------|-----------|----------|---------|--------|---------|
| Intercept                   | -0.238899 | 0.070962 | 140.235 | -3.367 | 0.001   |
| Time                        | -0.077554 | 0.044723 | 135.214 | -1.734 | 0.085   |
| CSF A $\beta_{1-42}$ status | 0.071522  | 0.145093 | 140.405 | 0.493  | 0.623   |
| CSF sPDGFR $\beta$          | -0.000278 | 0.000192 | 139.208 | -1.446 | 0.15    |
| CSF sPDGFR $\beta$ x time   | -0.000304 | 0.000119 | 127.458 | -2.544 | 0.012   |
| Intercept                   | -0.234876 | 0.068014 | 139.987 | -3.453 | 0.001   |
| Time                        | -0.088201 | 0.043783 | 136.92  | -2.015 | 0.046   |
| CSF pTau status             | -0.498812 | 0.154003 | 140.05  | -3.239 | 0.001   |
| CSF sPDGFR $\beta$          | -0.000297 | 0.000185 | 138.916 | -1.602 | 0.111   |
| CSF sPDGFR $\beta$ x time   | -0.000313 | 0.000117 | 129.855 | -2.665 | 0.009   |

**Supplementary Table 3. Linear mixed model analysis of CSF sPDGFR $\beta$  baseline values predicting future cognitive decline on age-, sex-, and education-corrected z-scores on mental status exam and the global cognitive composite of all neuropsychological tests in APOE4 carriers after controlling for CSF A $\beta$  and tau status. Significance by linear mixed model analysis; no multiple comparison correction applied. All tests are two-tailed (see Methods for further details).**

**APOE4 carriers (n=58)**

*CSF sPDGFR $\beta$  Predicting Change in Mental Status Controlling for CSF A $\beta_{1-42}$  and pTau status*

|                             | $\beta$               | SE       | df     | t      | p-value |
|-----------------------------|-----------------------|----------|--------|--------|---------|
| Intercept                   | -0.493185             | 0.21685  | 53.123 | -2.274 | 0.027   |
| Time                        | -0.066464             | 0.229312 | 54.021 | -0.29  | 0.773   |
| CSF A $\beta_{1-42}$ status | 0.209097              | 0.400371 | 54.583 | 0.522  | 0.604   |
| CSF sPDGFR $\beta$          | 0.000334              | 0.000546 | 52.841 | 0.612  | 0.543   |
| CSF sPDGFR $\beta$ x time   | -0.001621             | 0.000542 | 45.708 | -2.993 | 0.004   |
| Intercept                   | -0.349128             | 0.199119 | 54.509 | -1.753 | 0.085   |
| Time                        | -0.127275             | 0.222438 | 55.358 | -0.572 | 0.57    |
| CSF pTau status             | -1.313143             | 0.399477 | 54.433 | -3.287 | 0.002   |
| CSF sPDGFR $\beta$          | 3.39x10 <sup>-5</sup> | 0.000503 | 53.885 | 0.067  | 0.946   |
| CSF sPDGFR $\beta$ x time   | -0.001616             | 0.000525 | 47.055 | -3.077 | 0.003   |

*CSF sPDGFR $\beta$  Predicting Change in Global Composite Controlling for CSF A $\beta_{1-42}$  and pTau status*

|                             | $\beta$   | SE       | df     | t      | p-value |
|-----------------------------|-----------|----------|--------|--------|---------|
| Intercept                   | -0.334356 | 0.103951 | 53.211 | -3.216 | 0.002   |
| Time                        | -0.104365 | 0.071676 | 47.613 | -1.456 | 0.152   |
| CSF A $\beta_{1-42}$ status | 0.126515  | 0.194343 | 45.506 | 0.651  | 0.518   |
| CSF sPDGFR $\beta$          | -0.000118 | 0.000263 | 53.224 | -0.449 | 0.655   |
| CSF sPDGFR $\beta$ x time   | -0.00042  | 0.000168 | 39.136 | -2.502 | 0.017   |
| Intercept                   | -0.297598 | 0.099654 | 53.767 | -2.986 | 0.004   |
| Time                        | -0.113505 | 0.06901  | 50.395 | -1.645 | 0.106   |
| CSF pTau status             | -0.323346 | 0.198942 | 43.959 | -1.625 | 0.111   |
| CSF sPDGFR $\beta$          | -0.000147 | 0.000253 | 53.64  | -0.58  | 0.564   |
| CSF sPDGFR $\beta$ x time   | -0.000434 | 0.000162 | 42.223 | -2.679 | 0.01    |

**Supplementary Table 4. Linear mixed model analysis of the overall incremental predictive value of CSF sPDGFR $\beta$  baseline values in relation to cognitive decline on age-, sex-, and education-corrected z-scores on mental status exam and the global cognitive composite of all neuropsychological tests in APOE3 carriers after controlling for CSF A $\beta$  and tau status. Significance by linear mixed model analysis; no multiple comparison correction applied. All tests are two-tailed (see Methods for further details).**

**APOE3 carriers (n=88)**

*CSF sPDGFR $\beta$  Not Predicting Change in Mental Status Controlling for CSF A $\beta_{1-42}$  and pTau status*

|                             | $\beta$   | SE       | df      | t      | p-value |
|-----------------------------|-----------|----------|---------|--------|---------|
| Intercept                   | -0.351175 | 0.183267 | 366.785 | -1.916 | 0.056   |
| Time                        | -0.119878 | 0.145479 | 112.947 | -0.824 | 0.412   |
| CSF A $\beta_{1-42}$ status | -0.037947 | 0.36085  | 272.065 | -0.105 | 0.916   |
| CSF sPDGFR $\beta$          | -0.000446 | 0.000497 | 369.322 | -0.897 | 0.37    |
| CSF sPDGFR $\beta$ x time   | -0.000264 | 0.000402 | 111.691 | -0.658 | 0.512   |
| Intercept                   | -0.380945 | 0.171377 | 306.273 | -2.223 | 0.027   |
| Time                        | -0.125378 | 0.142834 | 119.044 | -0.878 | 0.382   |
| CSF pTau status             | -1.236054 | 0.375561 | 223.335 | -3.291 | 0.001   |
| CSF sPDGFR $\beta$          | -0.000478 | 0.000467 | 307.686 | -1.024 | 0.307   |
| CSF sPDGFR $\beta$ x time   | -0.00023  | 0.000399 | 117.444 | -0.577 | 0.565   |

*CSF sPDGFR $\beta$  Not Predicting Change in Global Composite Controlling for CSF A $\beta_{1-42}$  and pTau status*

|                             | $\beta$   | SE       | df     | t      | p-value |
|-----------------------------|-----------|----------|--------|--------|---------|
| Intercept                   | -0.191169 | 0.09844  | 85.805 | -1.942 | 0.055   |
| Time                        | -0.048517 | 0.060892 | 90.359 | -0.797 | 0.428   |
| CSF A $\beta_{1-42}$ status | 0.028411  | 0.197739 | 86.711 | 0.144  | 0.886   |
| CSF sPDGFR $\beta$          | -0.000344 | 0.000281 | 85.181 | -1.223 | 0.225   |
| CSF sPDGFR $\beta$ x time   | -0.000176 | 0.000178 | 93.73  | -0.989 | 0.325   |
| Intercept                   | -0.209294 | 0.094928 | 85.528 | -2.205 | 0.03    |
| Time                        | -0.054147 | 0.060094 | 90.311 | -0.901 | 0.37    |
| CSF pTau status             | -0.50794  | 0.215262 | 86.808 | -2.36  | 0.021   |
| CSF sPDGFR $\beta$          | -0.000356 | 0.000272 | 84.783 | -1.311 | 0.193   |
| CSF sPDGFR $\beta$ x time   | -0.000165 | 0.000177 | 94.172 | -0.933 | 0.353   |

**Supplementary Table 5. Hierarchical logistic regression analyses of CSF sPDGFR $\beta$  baseline values predicting cognitive impairment in *APOE4* but not in *APOE3* carriers based on clinical dementia rating (CDR) score 0.5 versus 0 after controlling for age, sex, education, HC and PHG volumes, and CSF A $\beta_{1-42}$  and pTau status.**

| <i>APOE4</i> carriers<br>(n=58) | CSF sPDGFR $\beta$ predicting CDR status | -2 Log<br>Likelihood          | Chi-<br>square | df    | p-value |         |
|---------------------------------|------------------------------------------|-------------------------------|----------------|-------|---------|---------|
|                                 | <i>Model Parameters for Step 1</i>       | 122.370                       | 6.582          | 1     | 0.01    |         |
|                                 | Step                                     | Predictor                     | $\beta$        | SE    | Wald    | p-value |
|                                 | 0                                        | Age (yrs)                     | 0.037          | 0.026 | 2.062   | 0.151   |
|                                 | 0                                        | Sex (ratio)                   | 0.57           | 0.459 | 1.543   | 0.214   |
|                                 | 0                                        | Education (attainment)        | -0.006         | 0.18  | 0.001   | 0.974   |
|                                 | 0                                        | CSF A $\beta_{1-42}$ (status) | -0.902         | 0.451 | 4.002   | 0.045   |
|                                 | 0                                        | CSF pTau (status)             | -0.975         | 0.492 | 3.928   | 0.047   |
|                                 | 1                                        | CSF sPDGFR $\beta$ (ng/mL)    | 0.001          | 0.001 | 6.127   | 0.013   |

  

| <i>APOE3</i> carriers<br>(n=88) | CSF sPDGFR $\beta$ predicting CDR status | -2 Log<br>Likelihood          | Chi-<br>square       | df    | p-value |         |
|---------------------------------|------------------------------------------|-------------------------------|----------------------|-------|---------|---------|
|                                 | <i>Model Parameters for Step 1</i>       | 166.319                       | 0.076                | 1     | 0.78    |         |
|                                 | Step                                     | Predictor                     | $\beta$              | SE    | Wald    | p-value |
|                                 | 0                                        | Age (yrs)                     | 0.069                | 0.024 | 8.472   | 0.004   |
|                                 | 0                                        | Sex (ratio)                   | 1.105                | 0.411 | 7.215   | 0.007   |
|                                 | 0                                        | Education (attainment)        | -0.273               | 0.158 | 3       | 0.083   |
|                                 | 0                                        | CSF A $\beta_{1-42}$ (status) | 0.106                | 0.418 | 0.065   | 0.799   |
|                                 | 0                                        | CSF pTau (status)             | -0.675               | 0.433 | 2.433   | 0.119   |
|                                 | 1                                        | CSF sPDGFR $\beta$ (ng/mL)    | 1.0x10 <sup>-4</sup> | 0.001 | 0.077   | 0.782   |

## 2. Supplementary Methods

### Quantification of the Blood-Brain Barrier Permeability

Post-processing analysis was performed using *Rocketship* software<sup>1</sup> running with Matlab. To account for a possible confounding effect of blood flow on DCE-MRI measurements, we determined in each studied individual the arterial input function (AIF) curve from the internal carotid artery (ICA), which provides a dynamic profile of a gadolinium tracer concentration in the arterial blood after the i.v. injection, instead of using an average value from the superior sagittal venous sinus to determine tracer concentration in blood<sup>2-5</sup>. Although not as ideal as simultaneous measurements of the blood flow on the same subjects, using the individual AIF dynamic profile measurements of the tracer concentration in the arterial blood self-corrects for possible differences in the blood flow that may affect delivery of the tracer to the brain via flow across the ICA, which tends to minimize possible confounding effects of changes in blood volume and blood flow that could potentially affect the  $K_{trans}$  measurements, we reported<sup>6,7</sup>. The AIF, which was extracted from a region-of-interest (ROI) positioned at the ICA, was fitted with a bi-exponential function prior to fitting with the Patlak model<sup>7,8</sup>. In a few cases when the ICA was not clearly visible a nearby large arterial vessel was used.

The Patlak linearized regression mathematical analysis was used to generate the BBB permeability  $K_{trans}$  maps, as we previously reported<sup>1,6-8</sup>. The high spatiotemporal resolution allowed not only simultaneous measurements of the regional BBB permeability in different white and gray matter regions, but also accurate calculations of the  $K_{trans}$  values in small anatomical regions as thin as cortical gray matter areas.

The present analysis requires that the tracer's diffusion across the BBB remains unidirectional during the acquisition time. The total tracer concentration in the tissue,  $C_{tissue}(t)$ , can be described as a function of the blood concentration,  $C_{AIF}(t)$ , the intravascular blood volume,  $v_p$ , and a blood-to-brain transfer constant,  $K_{trans}$ , that represents the flow from the intravascular to the extravascular extracellular space using equation below:

$$C_{tissue}(t) = K_{trans} \int_0^t C_{AIF}(u) du + v_p AIF(t)$$

We did not observe statistically significant intersubject variability in the measurement of  $v_p$  value. For instance,  $v_p$  (mean  $\pm$  SEM) in HC was  $0.0166 \pm 0.0003$  (n=128; CDR 0 *APOE3*),  $0.0167 \pm 0.0005$  (n=68; CDR 0 *APOE4*),  $0.0183 \pm 0.0009$  (n=14; CDR 0.5 *APOE3*), and  $0.0164 \pm 0.0009$  (n=25; CDR 0.5 *APOE4*). In PHG,  $v_p$  was  $0.0172 \pm 0.0003$  (n=128; CDR 0 *APOE3*),  $0.0171 \pm 0.0004$  (n=68; CDR 0 *APOE4*),  $0.0180 \pm 0.0009$  (n=14; CDR 0.5 *APOE3*), and  $0.0180 \pm 0.0008$  (n=25; CDR 0.5 *APOE4*). ROI-averaged analysis of DCE-MRI output maps was performed by an experienced neuroradiologist who manually drew ROIs on T1-weighted (FA 12°) pre-contrast MR images for each participant based on their own anatomy to minimize variability between individuals as seen at a macroscopic level (e.g., enlarged ventricles, cortical atrophy, hippocampal shrinkage). Thus, the regional BBB  $K_{trans}$  permeability were measured in 10 different gray matter ROIs including the hippocampus (HC), parahippocampal gyrus (PHG), caudate nucleus, thalamus, striatum, orbital frontal cortex (OFC), and inferior temporal gyrus (ITG), and white matter ROIs including subcortical watershed white matter fibers, corpus callosum, and internal capsule.



### 3. Supplementary Discussion

Although our data demonstrate self-autonomous activation of the CypA-MMP9 pathway in human iPSC-derived *APOE4* pericytes, earlier work in transgenic mice and pericyte cultures has shown that astrocyte-derived apoE4, but not apoE3, can also lead to activation of CypA-MMP9 pathway in pericytes in a non-cell-autonomous manner<sup>9</sup>. Therefore, whether the pericyte is a double culprit, *i.e.*, both an activator of the BBB breakdown process (being the producer of apoE4 protein and of the basement membrane-degrading enzyme MMP9) and subsequently a victim in the process (since they die and release sPDGFR $\beta$ ), leading to further BBB breakdown, remains to be seen, as well as the cell-specific sources of apoE4 contributing to this process.

BBB breakdown in HC and PHG regions in *APOE4* carriers provides clear anatomical substrate for episodic memory impairment likely caused by neuronal stress related to leaked blood-borne neurotoxic proteins that enter these regions after BBB disruption<sup>10</sup>. Since other cognitive functions such as attention, executive function, working memory, semantic fluency, etc., require connecting pathways linked to HC and medial temporal lobe regions<sup>6</sup>, disruption of these connections by BBB breakdown in the medial temporal lobe could also contribute to the observed cognitive deficits beyond memory, as seen in *APOE4* carriers (**Fig. 3**). Additionally, BBB breakdown in the caudate nucleus, that we show progresses with cognitive impairment in *APOE4* carriers (**Extended Data Fig. 1**), may contribute to the overall cognitive decline.

*APOE3* homozygotes also develop BBB breakdown during the early stages of cognitive impairment that is much less pronounced than in *APOE4* carriers, and is independent of A $\beta$  and tau (**Fig. 1b-d,l,m**), but in contrast to *APOE4* carriers does not implicate the CypA-MMP9 BBB-degrading pathway (**Fig. 4h,i,k**) and/or pericyte injury (**Fig. 4a,b**), as a major driver of BBB dysfunction during this early stage. Since loss of low density lipoprotein receptor-related protein 1 (LRP1) has been shown to limit the ability of apoE3 to suppress the CypA-MMP9 pathway in transgenic *APOE3* knock-in mice<sup>9</sup>, and LRP1 is reduced in blood vessels by aging and Alzheimer's disease<sup>11,12</sup> (see a recent review<sup>10</sup>), it is possible that reduced LRP1 levels with disease progression could potentially lead to activation of the CypA-MMP9 pathway in *APOE3* homozygotes. This possibility needs to be addressed by future longitudinal studies.

#### 4. Supplementary References

1. Barnes, S. R. *et al.* ROCKETSHIP: a flexible and modular software tool for the planning, processing and analysis of dynamic MRI studies. *BMC Med. Imaging* **15**, 19 (2015).
2. Taheri, S. *et al.* Blood-brain barrier permeability abnormalities in vascular cognitive impairment. *Stroke J. Cereb. Circ.* **42**, 2158–2163 (2011).
3. Taheri, S., Gasparovic, C., Shah, N. J. & Rosenberg, G. A. Quantitative measurement of blood-brain barrier permeability in human using dynamic contrast-enhanced MRI with fast T1 mapping. *Magn. Reson. Med.* **65**, 1036–1042 (2011).
4. Taheri, S., Rosenberg, G. A. & Ford, C. Quantification of blood-to-brain transfer rate in multiple sclerosis. *Mult. Scler. Relat. Disord.* **2**, 124–132 (2013).
5. Larsson, H. B. W., Courivaud, F., Rostrup, E. & Hansen, A. E. Measurement of brain perfusion, blood volume, and blood-brain barrier permeability, using dynamic contrast-enhanced T(1)-weighted MRI at 3 tesla. *Magn. Reson. Med.* **62**, 1270–1281 (2009).
6. Nation, D. A. *et al.* Blood-brain barrier breakdown is an early biomarker of human cognitive dysfunction. *Nat. Med.* **25**, 270–276 (2019).
7. Montagne, A. *et al.* Blood-brain barrier breakdown in the aging human hippocampus. *Neuron* **85**, 296–302 (2015).
8. Patlak, C. S. & Blasberg, R. G. Graphical evaluation of blood-to-brain transfer constants from multiple-time uptake data. Generalizations. *J. Cereb. Blood Flow Metab. Off. J. Int. Soc. Cereb. Blood Flow Metab.* **5**, 584–590 (1985).
9. Bell, R. D. *et al.* Apolipoprotein E controls cerebrovascular integrity via cyclophilin A. *Nature* **485**, 512–516 (2012).
10. Sweeney, M. D., Sagare, A. P. & Zlokovic, B. V. Blood-brain barrier breakdown in Alzheimer disease and other neurodegenerative disorders. *Nat. Rev. Neurol.* **14**, 133–150 (2018).
11. Halliday, M. R. *et al.* Accelerated pericyte degeneration and blood-brain barrier breakdown in apolipoprotein E4 carriers with Alzheimer's disease. *J. Cereb. Blood Flow Metab. Off. J. Int. Soc. Cereb. Blood Flow Metab.* **36**, 216–227 (2016).
12. Deane, R. *et al.* LRP/amyloid beta-peptide interaction mediates differential brain efflux of A $\beta$  isoforms. *Neuron* **43**, 333–344 (2004).
